# Supplementary material for: Microplastics in wetlands: contrasting fish contamination between mangroves and temporary ponds in southeastern Brazil
Source: Research Square preprint supplement (doi:10.21203/rs.3.rs-7861289/v1), 2025-10-29
Supplement: Supplementary file 1 [file 47972cc08ad216ef330f8b76.docx]

**Supplementary material 1**

**Microplastics in wetlands: contrasting fish contamination between mangroves and temporary ponds in southeastern Brazil**

Gustavo Henrique Soares Guedes¹, Laryssa Cordeiro¹, Luíz Felipe da Silva Pinto Azeredo², Francisco Gerson Araújo¹

¹Laboratório de Ecologia de Peixes, Departamento de Biologia Animal, Universidade Federal Rural do Rio de Janeiro, 23897-000, Seropédica, RJ, Brasil.

²Laboratório de Caracterização Instrumental, Instituto de Química, Universidade do Estado do Rio de Janeiro, 20550-900, Rio de Janeiro, RJ, Brasil.


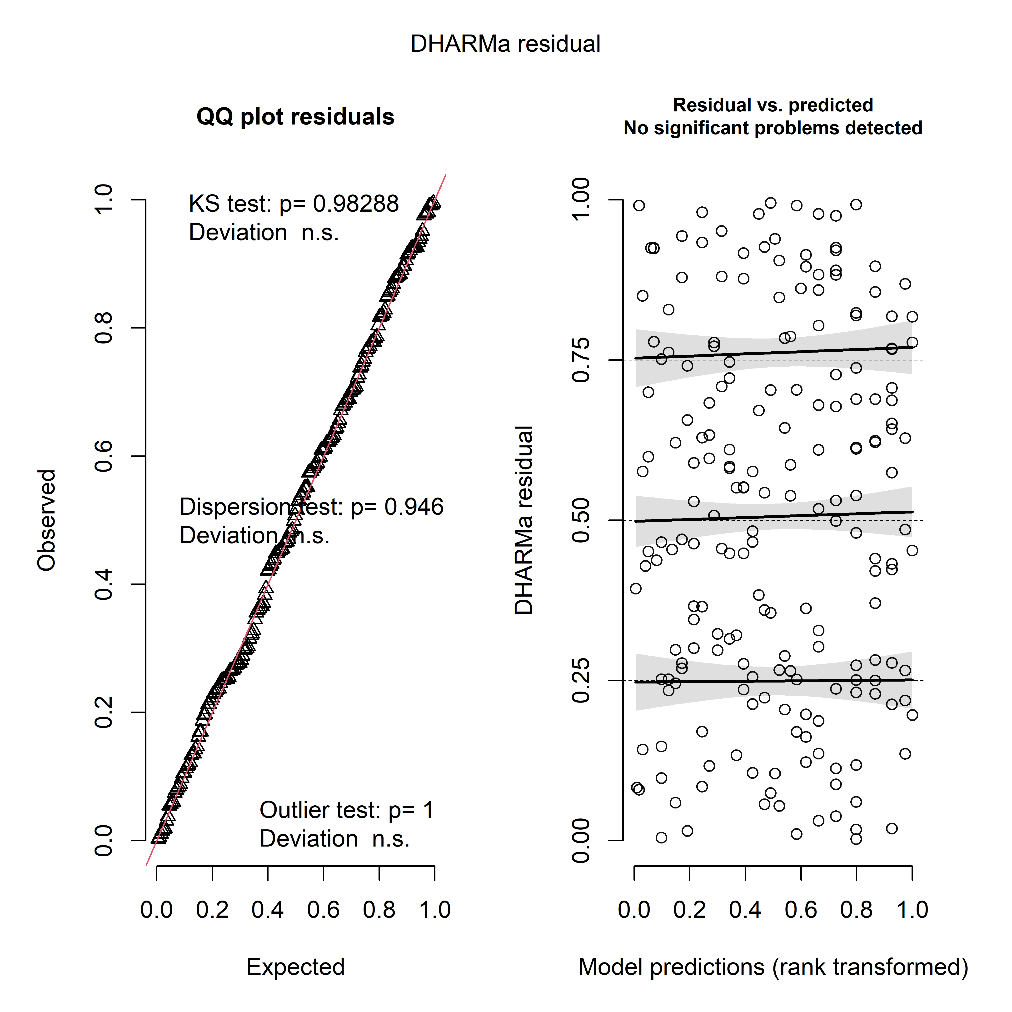


**Figure S1.** Residual diagnostics for the model fitted to investigate microplastic contamination in wetland fishes of Southeastern Brazil. The plot of residuals against predicted values does not show any particular pattern, also suggesting that the assumptions of the model have been met.

**Table S1.** Mean ± standard deviation of microplastic abundance stratified by particle morphology (microfibers, fragments, spheres), wetland (Mangrove and Temporary pond), and specie.

| Wetland/Specie | Microfibers | Fragments | Spheres | Pallets |
| --- | --- | --- | --- | --- |
| Mangrove |  |  |  |  |
| *Kryptolebias hermaphroditus* | 0.5±1.06 | 0.79±1.06 |  |  |
| *Kryptolebias ocellatus* | 0.47±0.79 | 1.03±1.54 |  | 0.04±0.19 |
| Temporary pond |  |  |  |  |
| *Leptopanchax opalescens* | 0.66±0.96 | 1.02±1.5 | 0.02±0.14 |  |
| *Notholebias minimus* | 0.82±1.3 | 0.78±1.23 |  | 0.02±0.14 |
| Total | 0.61±1.01 | 0.94±1.4 | 0.005±0.07 |  |

**Table S2.** Counts of different microplastic colors, stratified by wetland (Mangrove and Temporary pond), and specie.

| Wetland/Specie | Color | | | | | | | | | | |
| --- | --- | --- | --- | --- | --- | --- | --- | --- | --- | --- | --- |
|  | black | blue | brown | green | lilac | orange | pink | purple | red | lilac | yellow |
| Mangrove |  |  |  |  |  |  |  |  |  |  |  |
| *Kryptolebias hermaphroditus* | 1 | 22 |  | 4 |  |  |  |  | 1 |  |  |
| *Kryptolebias ocellatus* | 26 | 81 | 1 | 2 | 1 | 1 | 4 | 2 | 2 | 1 | 1 |
| Temporary pond |  |  |  |  |  |  |  |  |  |  |  |
| *Leptopanchax opalescens* | 21 | 59 |  | 1 |  | 1 |  |  | 2 |  | 1 |
| *Notholebias minimus* | 26 | 45 |  | 2 | 1 | 4 |  | 1 |  |  | 3 |
| Total | 74 | 207 | 1 | 9 | 2 | 6 | 4 | 3 | 5 | 1 | 5 |
