# Supplementary material for: Microplastics in wetlands: contrasting fish contamination between mangroves and temporary ponds in southeastern Brazil
Source: Research Square preprint supplement (doi:10.21203/rs.3.rs-7861289/v1), 2025-10-29
Supplement: Supplementary file 2 [file afd93dce2072006000945cc1.xlsx]

## Sheet: Metadata
	Supplementary material 2
	Microplastics in wetlands: contrasting fish contamination between mangroves and temporary ponds in southeastern Brazil
	Gustavo Henrique Soares Guedes¹, Laryssa Cordeiro¹, Luíz Felipe da Silva Pinto Azeredo², Francisco Gerson Araújo¹
	¹Laboratório de Ecologia de Peixes, Departamento de Biologia Animal, Universidade Federal Rural do Rio de Janeiro, 23897-000, Seropédica, RJ, Brasil.
	²Laboratório de Caracterização Instrumental, Instituto de Química, Universidade do Estado do Rio de Janeiro, 20550-900, Rio de Janeiro, RJ, Brasil.
	Sheet 1 - MP
	Cod — Unique specimen identifier.
	Local — Sampling site code: M1, M2 (mangrove) and T1, T2 (temporary pond).
	Wetland — Habitat type (categorical): Mangrove or Temporary pond.
	Specie — Species of the individual, e.g., Kryptolebias ocellatus, K. hermaphroditus, Leptopanchax opalescens, Notholebias minimus. (Header kept as “Specie”; recommended name: “Species”.)
	TL — Fish total length, in centimeters.
	Wight — Fish wet mass, in grams. (Header kept as “Wight”; recommended: “Weight”.)
	MP — Total number of microplastic particles found per individual.
	Microfibers — Count of microfiber particles per individual.
	Fragments — Count of fragment particles per individual.
	Pellets — Count of pellet particles per individual.
	Spheres — Count of sphere particles per individual.
	Sheet 2 - Color_length
	Cod — Unique specimen identifier.
	Local — Sampling site code: M1, M2 (mangrove) and T1, T2 (temporary pond).
	Wetland — Habitat type (categorical): Mangrove or Temporary pond.
	Specie — Species of the individual, e.g., Kryptolebias ocellatus, K. hermaphroditus, Leptopanchax opalescens, Notholebias minimus. (Header kept as “Specie”; recommended name: “Species”.)
	microplastic_length_µm — length of microplastic particles recovered from the individual (µm).
	Microfibers_color — Dominant color of microfiber particles.
	Fragments_color — Dominant color of fragment particles.
	Pellets_color — Dominant color of pellet particles.
	Spheres_color — Dominant color of sphere particles.

## Sheet: MP
cod	Local	Wetland	Specie	TL	Weight	MP	Microfibers	Fragments	Pellets	Spheres
KO1	M2	Mangrove	Kryptolebias ocellatus	1.4	0.41	0	0	0	0	0
KO2	M2	Mangrove	Kryptolebias ocellatus	1.3	0.26	0	0	0	0	0
KO3	M2	Mangrove	Kryptolebias ocellatus	1.3	0.31	1	0	1	0	0
KO4	M2	Mangrove	Kryptolebias ocellatus	2.8	0.24	1	0	1	0	0
KO5	M2	Mangrove	Kryptolebias ocellatus	3.8	0.51	0	0	0	0	0
KO6	M2	Mangrove	Kryptolebias hermaphroditus	3.9	0.61	0	0	0	0	0
KO7	M2	Mangrove	Kryptolebias ocellatus	2.6	0.18	0	0	0	0	0
KO8	M2	Mangrove	Kryptolebias ocellatus	3.5	0.45	1	1	0	0	0
KO9	M2	Mangrove	Kryptolebias ocellatus	2.9	0.27	2	1	1	0	0
KO10	M2	Mangrove	Kryptolebias hermaphroditus	3.1	0.32	2	1	1	0	0
KO11	M2	Mangrove	Kryptolebias ocellatus	1.9	0.07	1	1	0	0	0
KO12	M2	Mangrove	Kryptolebias ocellatus	4	0.29	0	0	0	0	0
KO13	M2	Mangrove	Kryptolebias ocellatus	2.8	0.29	0	0	0	0	0
KO14	M2	Mangrove	Kryptolebias ocellatus	2.9	0.25	0	0	0	0	0
KO15	M2	Mangrove	Kryptolebias hermaphroditus	3	0.24	3	0	3	0	0
KO16	M2	Mangrove	Kryptolebias ocellatus	2.7	0.19	0	0	0	0	0
KO17	M2	Mangrove	Kryptolebias hermaphroditus	2.8	0.22	0	0	0	0	0
KO18	M2	Mangrove	Kryptolebias hermaphroditus	3.1	0.28	0	0	0	0	0
KO19	M2	Mangrove	Kryptolebias ocellatus	2.3	0.11	3	2	1	0	0
KO20	M2	Mangrove	Kryptolebias ocellatus	3.1	0.32	0	0	0	0	0
KO21	M2	Mangrove	Kryptolebias ocellatus	3.8	0.54	7	0	7	0	0
KO22	M2	Mangrove	Kryptolebias ocellatus	3.3	0.35	4	1	2	1	0
KO23	M2	Mangrove	Kryptolebias ocellatus	2.5	0.16	1	0	1	0	0
KO24	M2	Mangrove	Kryptolebias ocellatus	2.7	0.2	2	1	1	0	0
KO25	M2	Mangrove	Kryptolebias ocellatus	2.8	0.24	3	2	1	0	0
KO26	M2	Mangrove	Kryptolebias ocellatus	3.6	0.48	1	0	1	0	0
KO27	M2	Mangrove	Kryptolebias ocellatus	3.3	0.36	2	1	0	1	0
KO28	M2	Mangrove	Kryptolebias ocellatus	1.7	0.06	0	0	0	0	0
KO29	M2	Mangrove	Kryptolebias hermaphroditus	1.9	0.08	0	0	0	0	0
KO30	M2	Mangrove	Kryptolebias hermaphroditus	3	0.29	2	0	2	0	0
KO31	M2	Mangrove	Kryptolebias ocellatus	3	0.27	0	0	0	0	0
KO32	M2	Mangrove	Kryptolebias ocellatus	2.2	0.09	1	1	0	0	0
KO33	M2	Mangrove	Kryptolebias ocellatus	2.6	0.16	0	0	0	0	0
KO34	M2	Mangrove	Kryptolebias ocellatus	3.4	0.34	4	0	4	0	0
KO35	M2	Mangrove	Kryptolebias ocellatus	2.5	0.15	0	0	0	0	0
KO36	M2	Mangrove	Kryptolebias ocellatus	2.1	0.08	1	0	1	0	0
KO37	M2	Mangrove	Kryptolebias ocellatus	3.5	0.43	2	0	2	0	0
KO38	M2	Mangrove	Kryptolebias ocellatus	3.1	0.3	0	0	0	0	0
KO39	M2	Mangrove	Kryptolebias hermaphroditus	2.1	0.09	2	0	2	0	0
KO40	M2	Mangrove	Kryptolebias ocellatus	1.9	0.05	4	0	4	0	0
KO41	M2	Mangrove	Kryptolebias ocellatus	3.5	0.45	1	0	1	0	0
KO42	M2	Mangrove	Kryptolebias ocellatus	2.2	0.09	4	1	3	0	0
KO43	M2	Mangrove	Kryptolebias hermaphroditus	3.3	0.33	4	3	1	0	0
KO44	M2	Mangrove	Kryptolebias ocellatus	3.1	0.29	1	0	1	0	0
KO45	M2	Mangrove	Kryptolebias hermaphroditus	3.1	0.31	0	0	0	0	0
KO46	M2	Mangrove	Kryptolebias ocellatus	2.4	0.1	2	0	2	0	0
KO47	M2	Mangrove	Kryptolebias ocellatus	2.6	0.14	0	0	0	0	0
KO48	M2	Mangrove	Kryptolebias ocellatus	1.8	0.02	0	0	0	0	0
KO49	M2	Mangrove	Kryptolebias hermaphroditus	1.7	0.02	0	0	0	0	0
KO50	M2	Mangrove	Kryptolebias ocellatus	2	0.04	1	1	0	0	0
KO51	M1	Mangrove	Kryptolebias ocellatus	1.5	0.02	4	0	4	0	0
KO52	M1	Mangrove	Kryptolebias ocellatus	2.1	0.06	1	0	1	0	0
KO53	M1	Mangrove	Kryptolebias ocellatus	2.5	0.14	6	2	4	0	0
KO54	M1	Mangrove	Kryptolebias ocellatus	1.6	0.03	0	0	0	0	0
KO55	M1	Mangrove	Kryptolebias hermaphroditus	2	0.06	0	0	0	0	0
KO56	M1	Mangrove	Kryptolebias hermaphroditus	2.5	0.12	0	0	0	0	0
KO57	M1	Mangrove	Kryptolebias ocellatus	2.4	0.08	1	0	1	0	0
KO58	M1	Mangrove	Kryptolebias ocellatus	3	0.18	0	0	0	0	0
KO59	M1	Mangrove	Kryptolebias ocellatus	1.3	0.01	3	1	2	0	0
KO60	M1	Mangrove	Kryptolebias ocellatus	2.2	0.09	5	0	4	1	0
KO61	M1	Mangrove	Kryptolebias ocellatus	1.6	0.03	8	1	7	0	0
KO62	M1	Mangrove	Kryptolebias ocellatus	1.4	0.02	3	1	2	0	0
KO63	M1	Mangrove	Kryptolebias hermaphroditus	1.8	0.05	6	4	2	0	0
KO64	M1	Mangrove	Kryptolebias ocellatus	1.1	0.01	4	3	1	0	0
KO65	M1	Mangrove	Kryptolebias ocellatus	2.9	0.06	0	0	0	0	0
KO66	M1	Mangrove	Kryptolebias ocellatus	1.9	0.03	1	0	1	0	0
KO67	M1	Mangrove	Kryptolebias ocellatus	1.5	0.03	3	1	2	0	0
KO68	M1	Mangrove	Kryptolebias ocellatus	1.5	0.03	0	0	0	0	0
KO69	M1	Mangrove	Kryptolebias ocellatus	1.4	0.03	0	0	0	0	0
KO70	M1	Mangrove	Kryptolebias ocellatus	1.3	0.02	1	0	1	0	0
KO71	M1	Mangrove	Kryptolebias ocellatus	2.5	0.11	0	0	0	0	0
KO72	M1	Mangrove	Kryptolebias ocellatus	1.6	0.03	0	0	0	0	0
KO73	M1	Mangrove	Kryptolebias hermaphroditus	1.5	0.03	0	0	0	0	0
KO74	M1	Mangrove	Kryptolebias ocellatus	1.8	0.05	2	2	0	0	0
KO75	M1	Mangrove	Kryptolebias ocellatus	2.6	0.13	1	1	0	0	0
KO76	M1	Mangrove	Kryptolebias ocellatus	2.1	0.06	1	0	1	0	0
KO77	M1	Mangrove	Kryptolebias ocellatus	2.3	0.13	3	1	1	1	0
KO78	M1	Mangrove	Kryptolebias hermaphroditus	1.7	0.06	3	0	3	0	0
KO79	M1	Mangrove	Kryptolebias ocellatus	1.7	0.07	1	1	0	0	0
KO80	M1	Mangrove	Kryptolebias ocellatus	1.4	0.04	2	1	1	0	0
KO81	M1	Mangrove	Kryptolebias ocellatus	2.1	0.09	0	0	0	0	0
KO82	M1	Mangrove	Kryptolebias ocellatus	1.9	0.07	1	0	1	0	0
KO83	M1	Mangrove	Kryptolebias ocellatus	1.9	0.07	0	0	0	0	0
KO84	M1	Mangrove	Kryptolebias ocellatus	1.6	0.05	2	2	0	0	0
KO85	M1	Mangrove	Kryptolebias ocellatus	1.9	0.07	3	0	3	0	0
KO86	M1	Mangrove	Kryptolebias ocellatus	2.3	0.14	1	0	1	0	0
KO87	M1	Mangrove	Kryptolebias hermaphroditus	2.1	0.08	2	2	0	0	0
KO88	M1	Mangrove	Kryptolebias ocellatus	2.4	0.11	0	0	0	0	0
KO89	M1	Mangrove	Kryptolebias hermaphroditus	2.9	0.17	0	0	0	0	0
KO90	M1	Mangrove	Kryptolebias ocellatus	2.7	0.14	2	1	1	0	0
KO91	M1	Mangrove	Kryptolebias hermaphroditus	3.2	0.21	1	1	0	0	0
KO92	M1	Mangrove	Kryptolebias ocellatus	2.8	0.22	4	0	4	0	0
KO93	M1	Mangrove	Kryptolebias ocellatus	2.4	0.12	2	1	1	0	0
KO94	M1	Mangrove	Kryptolebias hermaphroditus	2.6	0.2	1	0	1	0	0
KO95	M1	Mangrove	Kryptolebias ocellatus	2.5	0.14	4	4	0	0	0
KO96	M1	Mangrove	Kryptolebias ocellatus	2	0.09	0	0	0	0	0
KO97	M1	Mangrove	Kryptolebias hermaphroditus	2.6	0.13	1	1	0	0	0
KO98	M1	Mangrove	Kryptolebias hermaphroditus	1.7	0.07	0	0	0	0	0
KO99	M1	Mangrove	Kryptolebias hermaphroditus	2.1	0.11	2	0	2	0	0
KO100	M1	Mangrove	Kryptolebias hermaphroditus	2.2	0.09	2	0	2	0	0
LO1	T1	Temporary pond	Leptopanchax opalescens	1.3	0.02	2	1	1	0	0
LO2	T1	Temporary pond	Leptopanchax opalescens	1.5	0.03	2	0	2	0	0
LO3	T1	Temporary pond	Leptopanchax opalescens	1.2	0.02	1	0	1	0	0
LO4	T1	Temporary pond	Leptopanchax opalescens	1.5	0.02	0	0	0	0	0
LO5	T1	Temporary pond	Leptopanchax opalescens	1.3	0.01	1	0	1	0	0
LO6	T1	Temporary pond	Leptopanchax opalescens	1.4	0.02	2	0	2	0	0
LO7	T1	Temporary pond	Leptopanchax opalescens	1.1	0.008	0	0	0	0	0
LO8	T1	Temporary pond	Leptopanchax opalescens	1.7	0.04	2	2	0	0	0
LO9	T1	Temporary pond	Leptopanchax opalescens	1.7	0.03	0	0	0	0	0
LO10	T1	Temporary pond	Leptopanchax opalescens	1.5	0.02	1	1	0	0	0
LO11	T1	Temporary pond	Leptopanchax opalescens	1.6	0.03	3	1	2	0	0
LO12	T1	Temporary pond	Leptopanchax opalescens	1.3	0.03	2	0	2	0	0
LO13	T1	Temporary pond	Leptopanchax opalescens	1.7	0.04	7	0	7	0	0
LO14	T1	Temporary pond	Leptopanchax opalescens	1.6	0.04	6	3	3	0	0
LO15	T1	Temporary pond	Leptopanchax opalescens	1.3	0.01	1	0	1	0	0
LO16	T1	Temporary pond	Leptopanchax opalescens	1.3	0.02	0	0	0	0	0
LO17	T1	Temporary pond	Leptopanchax opalescens	1.5	0.02	1	0	1	0	0
LO18	T1	Temporary pond	Leptopanchax opalescens	1.3	0.008	3	1	2	0	0
LO19	T1	Temporary pond	Leptopanchax opalescens	1.7	0.03	0	0	0	0	0
LO20	T1	Temporary pond	Leptopanchax opalescens	1.6	0.03	0	0	0	0	0
LO21	T1	Temporary pond	Leptopanchax opalescens	1.6	0.02	4	0	3	0	1
LO22	T1	Temporary pond	Leptopanchax opalescens	1.8	0.06	0	0	0	0	0
LO23	T1	Temporary pond	Leptopanchax opalescens	1.4	0.01	0	0	0	0	0
LO24	T1	Temporary pond	Leptopanchax opalescens	1.2	0.02	0	0	0	0	0
LO25	T1	Temporary pond	Leptopanchax opalescens	1.4	0.02	2	0	2	0	0
LO26	T1	Temporary pond	Leptopanchax opalescens	1.2	0.01	0	0	0	0	0
LO27	T1	Temporary pond	Leptopanchax opalescens	1.6	0.05	5	2	3	0	0
LO28	T1	Temporary pond	Leptopanchax opalescens	1.4	0.03	0	0	0	0	0
LO29	T1	Temporary pond	Leptopanchax opalescens	1.2	0.02	0	0	0	0	0
LO30	T1	Temporary pond	Leptopanchax opalescens	1.7	0.07	2	0	2	0	0
LO31	T1	Temporary pond	Leptopanchax opalescens	1.5	0.05	0	0	0	0	0
LO32	T1	Temporary pond	Leptopanchax opalescens	1.1	0.02	3	0	3	0	0
LO33	T1	Temporary pond	Leptopanchax opalescens	1.8	0.07	0	0	0	0	0
LO34	T1	Temporary pond	Leptopanchax opalescens	1.3	0.04	0	0	0	0	0
LO35	T1	Temporary pond	Leptopanchax opalescens	1.6	0.05	0	0	0	0	0
LO36	T1	Temporary pond	Leptopanchax opalescens	1.3	0.04	3	1	2	0	0
LO37	T1	Temporary pond	Leptopanchax opalescens	1.5	0.04	0	0	0	0	0
LO38	T1	Temporary pond	Leptopanchax opalescens	1.1	0.01	1	1	0	0	0
LO39	T1	Temporary pond	Leptopanchax opalescens	1.4	0.03	1	1	0	0	0
LO40	T1	Temporary pond	Leptopanchax opalescens	1.5	0.04	2	1	1	0	0
LO41	T1	Temporary pond	Leptopanchax opalescens	1.3	0.03	2	2	0	0	0
LO42	T1	Temporary pond	Leptopanchax opalescens	1.1	0.02	4	3	1	0	0
LO43	T1	Temporary pond	Leptopanchax opalescens	1.9	0.06	8	2	6	0	0
LO44	T1	Temporary pond	Leptopanchax opalescens	1.4	0.03	2	2	0	0	0
LO45	T1	Temporary pond	Leptopanchax opalescens	1.3	0.02	3	2	1	0	0
LO46	T1	Temporary pond	Leptopanchax opalescens	1.7	0.05	4	3	1	0	0
LO47	T1	Temporary pond	Leptopanchax opalescens	1.4	0.03	0	0	0	0	0
LO48	T1	Temporary pond	Leptopanchax opalescens	1.3	0.02	0	0	0	0	0
LO49	T1	Temporary pond	Leptopanchax opalescens	1.3	0.02	3	2	1	0	0
LO50	T1	Temporary pond	Leptopanchax opalescens	1.5	0.04	2	2	0	0	0
NB1	T2	Temporary pond	Notholebias minimus	1.6	0.04	4	2	2	0	0
NB2	T2	Temporary pond	Notholebias minimus	1.2	0.02	5	0	5	0	0
NB3	T2	Temporary pond	Notholebias minimus	1.6	0.03	0	0	0	0	0
NB4	T2	Temporary pond	Notholebias minimus	1.6	0.04	5	0	4	1	0
NB5	T2	Temporary pond	Notholebias minimus	1.4	0.02	1	0	1	0	0
NB6	T2	Temporary pond	Notholebias minimus	1.7	0.04	1	1	0	0	0
NB7	T2	Temporary pond	Notholebias minimus	1.7	0.05	3	2	0	1	0
NB8	T2	Temporary pond	Notholebias minimus	1.6	0.04	1	0	1	0	0
NB9	T2	Temporary pond	Notholebias minimus	1.5	0.03	0	0	0	0	0
NB10	T2	Temporary pond	Notholebias minimus	1.4	0.03	5	2	3	0	0
NB11	T2	Temporary pond	Notholebias minimus	1.5	0.03	0	0	0	0	0
NB12	T2	Temporary pond	Notholebias minimus	1.6	0.04	0	0	0	0	0
NB13	T2	Temporary pond	Notholebias minimus	1.8	0.05	0	0	0	0	0
NB14	T2	Temporary pond	Notholebias minimus	1.5	0.02	3	1	2	0	0
NB15	T2	Temporary pond	Notholebias minimus	1.5	0.02	3	0	3	0	0
NB16	T2	Temporary pond	Notholebias minimus	1.5	0.03	8	6	2	0	0
NB17	T2	Temporary pond	Notholebias minimus	1.9	0.08	0	0	0	0	0
NB18	T2	Temporary pond	Notholebias minimus	1.7	0.05	4	3	1	0	0
NB19	T2	Temporary pond	Notholebias minimus	1.2	0.01	2	2	0	0	0
NB20	T2	Temporary pond	Notholebias minimus	1.7	0.05	0	0	0	0	0
NB21	T2	Temporary pond	Notholebias minimus	1.9	0.07	2	2	0	0	0
NB22	T2	Temporary pond	Notholebias minimus	1.7	0.06	0	0	0	0	0
NB23	T2	Temporary pond	Notholebias minimus	2.6	0.16	3	1	2	0	0
NB24	T2	Temporary pond	Notholebias minimus	1.8	0.04	4	2	2	0	0
NB25	T2	Temporary pond	Notholebias minimus	1.6	0.06	1	0	1	0	0
NB26	T2	Temporary pond	Notholebias minimus	2.1	0.09	1	1	0	0	0
NB27	T2	Temporary pond	Notholebias minimus	2.1	0.09	0	0	0	0	0
NB28	T2	Temporary pond	Notholebias minimus	2.2	0.13	0	0	0	0	0
NB29	T2	Temporary pond	Notholebias minimus	2.1	0.1	0	0	0	0	0
NB30	T2	Temporary pond	Notholebias minimus	1.5	0.03	3	1	2	0	0
NB31	T2	Temporary pond	Notholebias minimus	2.6	0.09	1	1	0	0	0
NB32	T2	Temporary pond	Notholebias minimus	2	0.15	5	2	3	0	0
NB33	T2	Temporary pond	Notholebias minimus	2.6	0.18	0	0	0	0	0
NB34	T2	Temporary pond	Notholebias minimus	1.6	0.03	2	0	2	0	0
NB35	T2	Temporary pond	Notholebias minimus	1.3	0.02	4	4	0	0	0
NB36	T2	Temporary pond	Notholebias minimus	1.5	0.02	0	0	0	0	0
NB37	T2	Temporary pond	Notholebias minimus	1.4	0.07	0	0	0	0	0
NB38	T2	Temporary pond	Notholebias minimus	1.8	0.07	0	0	0	0	0
NB39	T2	Temporary pond	Notholebias minimus	1.9	0.04	0	0	0	0	0
NB40	T2	Temporary pond	Notholebias minimus	1.9	0.05	0	0	0	0	0
NB41	T2	Temporary pond	Notholebias minimus	2.4	0.12	1	1	0	0	0
NB42	T2	Temporary pond	Notholebias minimus	2.1	0.09	1	0	1	0	0
NB43	T2	Temporary pond	Notholebias minimus	2.1	0.12	0	0	0	0	0
NB44	T2	Temporary pond	Notholebias minimus	1.4	0.02	4	4	0	0	0
NB45	T2	Temporary pond	Notholebias minimus	2.2	0.08	0	0	0	0	0
NB46	T2	Temporary pond	Notholebias minimus	1.8	0.06	4	2	2	0	0
NB47	T2	Temporary pond	Notholebias minimus	2	0.1	0	0	0	0	0
NB48	T2	Temporary pond	Notholebias minimus	1.7	0.07	0	0	0	0	0
NB49	T2	Temporary pond	Notholebias minimus	2.1	0.08	1	1	0	0	0
NB50	T2	Temporary pond	Notholebias minimus	1.5	0.03	0	0	0	0	0

## Sheet: Color_length
cod	Local	Wetland	Specie	microplastic_length_µm	Microfibers_color	Fragments_color	Pellets_color	Spheres_color
LO1	T1	Temporary pond	Leptopanchax opalescens	357	blue
LO1	T1	Temporary pond	Leptopanchax opalescens	527		blue
LO2	T1	Temporary pond	Leptopanchax opalescens	795		blue
LO2	T1	Temporary pond	Leptopanchax opalescens	1090		blue
LO3	T1	Temporary pond	Leptopanchax opalescens	348		black
LO5	T1	Temporary pond	Leptopanchax opalescens	1194		blue
LO6	T1	Temporary pond	Leptopanchax opalescens	2179		blue
LO6	T1	Temporary pond	Leptopanchax opalescens	1199		blue
LO8	T1	Temporary pond	Leptopanchax opalescens	807	blue
LO8	T1	Temporary pond	Leptopanchax opalescens	522	black
LO10	T1	Temporary pond	Leptopanchax opalescens	2161	black
LO11	T1	Temporary pond	Leptopanchax opalescens	616	blue
LO11	T1	Temporary pond	Leptopanchax opalescens	931		blue
LO11	T1	Temporary pond	Leptopanchax opalescens	1175		blue
LO12	T1	Temporary pond	Leptopanchax opalescens	2872		blue
LO12	T1	Temporary pond	Leptopanchax opalescens	2594		blue
LO13	T1	Temporary pond	Leptopanchax opalescens	325		black
LO13	T1	Temporary pond	Leptopanchax opalescens	85		black
LO13	T1	Temporary pond	Leptopanchax opalescens	1689		blue
LO13	T1	Temporary pond	Leptopanchax opalescens	832		blue
LO13	T1	Temporary pond	Leptopanchax opalescens	1139		blue
LO13	T1	Temporary pond	Leptopanchax opalescens	834		blue
LO13	T1	Temporary pond	Leptopanchax opalescens	753		black
LO14	T1	Temporary pond	Leptopanchax opalescens	449	black
LO14	T1	Temporary pond	Leptopanchax opalescens	80	black
LO14	T1	Temporary pond	Leptopanchax opalescens	1004		blue
LO14	T1	Temporary pond	Leptopanchax opalescens	281	black
LO14	T1	Temporary pond	Leptopanchax opalescens	901		blue
LO14	T1	Temporary pond	Leptopanchax opalescens	159		black
LO15	T1	Temporary pond	Leptopanchax opalescens	1073		blue
LO17	T1	Temporary pond	Leptopanchax opalescens	665		blue
LO18	T1	Temporary pond	Leptopanchax opalescens	280	black
LO18	T1	Temporary pond	Leptopanchax opalescens	841		blue
LO18	T1	Temporary pond	Leptopanchax opalescens	554		black
LO21	T1	Temporary pond	Leptopanchax opalescens	886		blue
LO21	T1	Temporary pond	Leptopanchax opalescens	790		blue
LO21	T1	Temporary pond	Leptopanchax opalescens	77		black
LO21	T1	Temporary pond	Leptopanchax opalescens	22				black
LO25	T1	Temporary pond	Leptopanchax opalescens	375		black
LO25	T1	Temporary pond	Leptopanchax opalescens	1041		blue
LO27	T1	Temporary pond	Leptopanchax opalescens	1300		blue
LO27	T1	Temporary pond	Leptopanchax opalescens	911		blue
LO27	T1	Temporary pond	Leptopanchax opalescens	1305	blue
LO27	T1	Temporary pond	Leptopanchax opalescens	264		blue
LO27	T1	Temporary pond	Leptopanchax opalescens	577	blue
LO30	T1	Temporary pond	Leptopanchax opalescens	1378		blue
LO30	T1	Temporary pond	Leptopanchax opalescens	786		blue
LO32	T1	Temporary pond	Leptopanchax opalescens	1026		blue
LO32	T1	Temporary pond	Leptopanchax opalescens	995		blue
LO32	T1	Temporary pond	Leptopanchax opalescens	1011		blue
LO36	T1	Temporary pond	Leptopanchax opalescens	1027		blue
LO36	T1	Temporary pond	Leptopanchax opalescens	885	blue
LO36	T1	Temporary pond	Leptopanchax opalescens	1311		blue
LO38	T1	Temporary pond	Leptopanchax opalescens	2358	blue
LO39	T1	Temporary pond	Leptopanchax opalescens	2128	blue
LO40	T1	Temporary pond	Leptopanchax opalescens	1447	red
LO40	T1	Temporary pond	Leptopanchax opalescens	806		blue
LO41	T1	Temporary pond	Leptopanchax opalescens	4192	black
LO41	T1	Temporary pond	Leptopanchax opalescens	2014	orange
LO42	T1	Temporary pond	Leptopanchax opalescens	1223		blue
LO42	T1	Temporary pond	Leptopanchax opalescens	1274	blue
LO42	T1	Temporary pond	Leptopanchax opalescens	618	blue
LO42	T1	Temporary pond	Leptopanchax opalescens	1677	blue
LO43	T1	Temporary pond	Leptopanchax opalescens	548	blue
LO43	T1	Temporary pond	Leptopanchax opalescens	87		black
LO43	T1	Temporary pond	Leptopanchax opalescens	113		black
LO43	T1	Temporary pond	Leptopanchax opalescens	104		black
LO43	T1	Temporary pond	Leptopanchax opalescens	192		blue
LO43	T1	Temporary pond	Leptopanchax opalescens	1111		blue
LO43	T1	Temporary pond	Leptopanchax opalescens	1283		blue
LO43	T1	Temporary pond	Leptopanchax opalescens	1361	green
LO44	T1	Temporary pond	Leptopanchax opalescens	908	blue
LO44	T1	Temporary pond	Leptopanchax opalescens	556	blue
LO45	T1	Temporary pond	Leptopanchax opalescens	1970	black
LO45	T1	Temporary pond	Leptopanchax opalescens	442	black
LO45	T1	Temporary pond	Leptopanchax opalescens	311		blue
LO46	T1	Temporary pond	Leptopanchax opalescens	2470	blue
LO46	T1	Temporary pond	Leptopanchax opalescens	1032	blue
LO46	T1	Temporary pond	Leptopanchax opalescens	502		blue
LO46	T1	Temporary pond	Leptopanchax opalescens	1055	blue
LO49	T1	Temporary pond	Leptopanchax opalescens	582	yellow
LO49	T1	Temporary pond	Leptopanchax opalescens	1184		blue
LO49	T1	Temporary pond	Leptopanchax opalescens	1269	blue
LO50	T1	Temporary pond	Leptopanchax opalescens	3800	red
LO50	T1	Temporary pond	Leptopanchax opalescens	901	blue
NB1	T2	Temporary pond	Notholebias minimus	316	blue
NB1	T2	Temporary pond	Notholebias minimus	564	blue
NB1	T2	Temporary pond	Notholebias minimus	461		black
NB1	T2	Temporary pond	Notholebias minimus	520		blue
NB2	T2	Temporary pond	Notholebias minimus	1172		blue
NB2	T2	Temporary pond	Notholebias minimus	476		blue
NB2	T2	Temporary pond	Notholebias minimus	1513		blue
NB2	T2	Temporary pond	Notholebias minimus	273		orange
NB2	T2	Temporary pond	Notholebias minimus	446		black
NB4	T2	Temporary pond	Notholebias minimus	283		black
NB4	T2	Temporary pond	Notholebias minimus	1082		blue
NB4	T2	Temporary pond	Notholebias minimus	101				black
NB4	T2	Temporary pond	Notholebias minimus	723		black
NB4	T2	Temporary pond	Notholebias minimus	819		yellow
NB5	T2	Temporary pond	Notholebias minimus	1331		yellow
NB6	T2	Temporary pond	Notholebias minimus	1657	blue
NB7	T2	Temporary pond	Notholebias minimus	961	blue
NB7	T2	Temporary pond	Notholebias minimus	96				yellow
NB7	T2	Temporary pond	Notholebias minimus	273	black
NB8	T2	Temporary pond	Notholebias minimus	793		blue
NB10	T2	Temporary pond	Notholebias minimus	719	green
NB10	T2	Temporary pond	Notholebias minimus	357	blue
NB10	T2	Temporary pond	Notholebias minimus	312		blue
NB10	T2	Temporary pond	Notholebias minimus	640		black
NB10	T2	Temporary pond	Notholebias minimus	101		black
NB14	T2	Temporary pond	Notholebias minimus	595	blue
NB14	T2	Temporary pond	Notholebias minimus	3962		lilac
NB14	T2	Temporary pond	Notholebias minimus	624		black
NB15	T2	Temporary pond	Notholebias minimus	954		blue
NB15	T2	Temporary pond	Notholebias minimus	425		black
NB15	T2	Temporary pond	Notholebias minimus	444		blue
NB16	T2	Temporary pond	Notholebias minimus	484	blue
NB16	T2	Temporary pond	Notholebias minimus	565		blue
NB16	T2	Temporary pond	Notholebias minimus	304	blue
NB16	T2	Temporary pond	Notholebias minimus	815	black
NB16	T2	Temporary pond	Notholebias minimus	273		black
NB16	T2	Temporary pond	Notholebias minimus	694	blue
NB16	T2	Temporary pond	Notholebias minimus	371	blue
NB16	T2	Temporary pond	Notholebias minimus	663	blue
NB18	T2	Temporary pond	Notholebias minimus	2124		black
NB18	T2	Temporary pond	Notholebias minimus	762	blue
NB18	T2	Temporary pond	Notholebias minimus	368	blue
NB18	T2	Temporary pond	Notholebias minimus	1713	blue
NB19	T2	Temporary pond	Notholebias minimus	425	black
NB19	T2	Temporary pond	Notholebias minimus	1155	blue
NB21	T2	Temporary pond	Notholebias minimus	1642	blue
NB21	T2	Temporary pond	Notholebias minimus	1228	blue
NB23	T2	Temporary pond	Notholebias minimus	868		blue
NB23	T2	Temporary pond	Notholebias minimus	432	blue
NB23	T2	Temporary pond	Notholebias minimus	419		blue
NB24	T2	Temporary pond	Notholebias minimus	1854		purple
NB24	T2	Temporary pond	Notholebias minimus	1066	blue
NB24	T2	Temporary pond	Notholebias minimus	795		black
NB24	T2	Temporary pond	Notholebias minimus	588	black
NB25	T2	Temporary pond	Notholebias minimus	2497		black
NB26	T2	Temporary pond	Notholebias minimus	461	black
NB30	T2	Temporary pond	Notholebias minimus	275	blue
NB30	T2	Temporary pond	Notholebias minimus	225		orange
NB30	T2	Temporary pond	Notholebias minimus	833	orange
NB31	T2	Temporary pond	Notholebias minimus	1727	blue
NB32	T2	Temporary pond	Notholebias minimus	548	blue
NB32	T2	Temporary pond	Notholebias minimus	592		black
NB32	T2	Temporary pond	Notholebias minimus	214		orange
NB32	T2	Temporary pond	Notholebias minimus	1689	blue
NB32	T2	Temporary pond	Notholebias minimus	636		black
NB34	T2	Temporary pond	Notholebias minimus	867		blue
NB34	T2	Temporary pond	Notholebias minimus	1986		blue
NB35	T2	Temporary pond	Notholebias minimus	977	black
NB35	T2	Temporary pond	Notholebias minimus	432	black
NB35	T2	Temporary pond	Notholebias minimus	2308	blue
NB35	T2	Temporary pond	Notholebias minimus	2255	blue
NB41	T2	Temporary pond	Notholebias minimus	2705	blue
NB42	T2	Temporary pond	Notholebias minimus	1922		yellow
NB44	T2	Temporary pond	Notholebias minimus	2435	blue
NB44	T2	Temporary pond	Notholebias minimus	1328	blue
NB44	T2	Temporary pond	Notholebias minimus	294	blue
NB44	T2	Temporary pond	Notholebias minimus	488		black
NB46	T2	Temporary pond	Notholebias minimus	937		black
NB46	T2	Temporary pond	Notholebias minimus	198	black
NB46	T2	Temporary pond	Notholebias minimus	1098		blue
NB46	T2	Temporary pond	Notholebias minimus	3076	green
NB49	T2	Temporary pond	Notholebias minimus	366	blue
KO3	M2	Mangrove	Kryptolebias ocellatus	414		blue
KO4	M2	Mangrove	Kryptolebias ocellatus	196		blue
KO8	M2	Mangrove	Kryptolebias ocellatus	868	blue
KO9	M2	Mangrove	Kryptolebias ocellatus	236		blue
KO9	M2	Mangrove	Kryptolebias ocellatus	528	black
KO10	M2	Mangrove	Kryptolebias hermaphroditus	1543	blue
KO10	M2	Mangrove	Kryptolebias hermaphroditus	207		blue
KO11	M2	Mangrove	Kryptolebias ocellatus	1341	blue
KO15	M2	Mangrove	Kryptolebias hermaphroditus	189		blue
KO15	M2	Mangrove	Kryptolebias ocellatus	247		blue
KO15	M2	Mangrove	Kryptolebias ocellatus	473		blue
KO19	M2	Mangrove	Kryptolebias ocellatus	202		blue
KO19	M2	Mangrove	Kryptolebias ocellatus	417	blue
KO19	M2	Mangrove	Kryptolebias ocellatus	146	blue
KO21	M2	Mangrove	Kryptolebias ocellatus	245		blue
KO21	M2	Mangrove	Kryptolebias ocellatus	122		blue
KO21	M2	Mangrove	Kryptolebias ocellatus	390		blue
KO21	M2	Mangrove	Kryptolebias ocellatus	207		blue
KO21	M2	Mangrove	Kryptolebias ocellatus	183		blue
KO21	M2	Mangrove	Kryptolebias ocellatus	249		blue
KO21	M2	Mangrove	Kryptolebias ocellatus	334		blue
KO22	M2	Mangrove	Kryptolebias ocellatus	917	blue
KO22	M2	Mangrove	Kryptolebias ocellatus	189		blue
KO22	M2	Mangrove	Kryptolebias ocellatus	169		blue
KO22	M2	Mangrove	Kryptolebias ocellatus	273				lilac
KO23	M2	Mangrove	Kryptolebias ocellatus	168		blue
KO24	M2	Mangrove	Kryptolebias ocellatus	97		blue
KO24	M2	Mangrove	Kryptolebias ocellatus	2012	black
KO25	M2	Mangrove	Kryptolebias ocellatus	180		blue
KO25	M2	Mangrove	Kryptolebias ocellatus	2480	blue
KO25	M2	Mangrove	Kryptolebias ocellatus	2165	blue
KO26	M2	Mangrove	Kryptolebias ocellatus	252		blue
KO27	M2	Mangrove	Kryptolebias ocellatus	214				blue
KO27	M2	Mangrove	Kryptolebias ocellatus	524	blue
KO30	M2	Mangrove	Kryptolebias hermaphroditus	400		blue
KO30	M2	Mangrove	Kryptolebias hermaphroditus	170		blue
KO32	M2	Mangrove	Kryptolebias ocellatus	2730	blue
KO34	M2	Mangrove	Kryptolebias ocellatus	308		blue
KO34	M2	Mangrove	Kryptolebias ocellatus	257		blue
KO34	M2	Mangrove	Kryptolebias ocellatus	233		blue
KO34	M2	Mangrove	Kryptolebias ocellatus	221		blue
KO36	M2	Mangrove	Kryptolebias ocellatus	1069		blue
KO37	M2	Mangrove	Kryptolebias ocellatus	581		blue
KO37	M2	Mangrove	Kryptolebias ocellatus	790		black
KO39	M2	Mangrove	Kryptolebias hermaphroditus	488		blue
KO39	M2	Mangrove	Kryptolebias ocellatus	208		black
KO40	M2	Mangrove	Kryptolebias ocellatus	604		blue
KO40	M2	Mangrove	Kryptolebias ocellatus	224		black
KO40	M2	Mangrove	Kryptolebias ocellatus	407		blue
KO40	M2	Mangrove	Kryptolebias ocellatus	272	black
KO41	M2	Mangrove	Kryptolebias ocellatus	1239		black
KO42	M2	Mangrove	Kryptolebias ocellatus	457		blue
KO42	M2	Mangrove	Kryptolebias ocellatus	484		blue
KO42	M2	Mangrove	Kryptolebias ocellatus	135	black
KO42	M2	Mangrove	Kryptolebias ocellatus	220		black
KO43	M2	Mangrove	Kryptolebias hermaphroditus	835	blue
KO43	M2	Mangrove	Kryptolebias hermaphroditus	488	blue
KO43	M2	Mangrove	Kryptolebias hermaphroditus	675	blue
KO43	M2	Mangrove	Kryptolebias hermaphroditus	1143		blue
KO44	M2	Mangrove	Kryptolebias ocellatus	1694		blue
KO46	M2	Mangrove	Kryptolebias ocellatus	2064		lilac
KO46	M2	Mangrove	Kryptolebias ocellatus	955		blue
KO50	M2	Mangrove	Kryptolebias ocellatus	1370	blue
KO51	M1	Mangrove	Kryptolebias ocellatus	186		black
KO51	M1	Mangrove	Kryptolebias ocellatus	347		blue
KO51	M1	Mangrove	Kryptolebias ocellatus	656		blue
KO51	M1	Mangrove	Kryptolebias ocellatus	567		blue
KO52	M1	Mangrove	Kryptolebias ocellatus	536		blue
KO53	M1	Mangrove	Kryptolebias ocellatus	302	blue
KO53	M1	Mangrove	Kryptolebias ocellatus	298		black
KO53	M1	Mangrove	Kryptolebias ocellatus	1096		blue
KO53	M1	Mangrove	Kryptolebias ocellatus	842		blue
KO53	M1	Mangrove	Kryptolebias ocellatus	204		yellow
KO53	M1	Mangrove	Kryptolebias ocellatus	2169	brown
KO57	M1	Mangrove	Kryptolebias ocellatus	1404		blue
KO59	M1	Mangrove	Kryptolebias ocellatus	458		blue
KO59	M1	Mangrove	Kryptolebias ocellatus	145	black
KO59	M1	Mangrove	Kryptolebias ocellatus	168		black
KO60	M1	Mangrove	Kryptolebias ocellatus	548		black
KO60	M1	Mangrove	Kryptolebias ocellatus	497		black
KO60	M1	Mangrove	Kryptolebias ocellatus	344		blue
KO60	M1	Mangrove	Kryptolebias ocellatus	405		black
KO60	M1	Mangrove	Kryptolebias ocellatus	26				orange
KO61	M1	Mangrove	Kryptolebias ocellatus	1986		blue
KO61	M1	Mangrove	Kryptolebias ocellatus	1269		blue
KO61	M1	Mangrove	Kryptolebias ocellatus	325	blue
KO61	M1	Mangrove	Kryptolebias ocellatus	31		black
KO61	M1	Mangrove	Kryptolebias ocellatus	64		black
KO61	M1	Mangrove	Kryptolebias ocellatus	1043		blue
KO61	M1	Mangrove	Kryptolebias ocellatus	2425		blue
KO61	M1	Mangrove	Kryptolebias ocellatus	926		blue
KO62	M1	Mangrove	Kryptolebias ocellatus	1076		blue
KO62	M1	Mangrove	Kryptolebias ocellatus	754	blue
KO62	M1	Mangrove	Kryptolebias ocellatus	223		black
KO63	M1	Mangrove	Kryptolebias hermaphroditus	445	green
KO63	M1	Mangrove	Kryptolebias hermaphroditus	318	blue
KO63	M1	Mangrove	Kryptolebias hermaphroditus	366		blue
KO63	M1	Mangrove	Kryptolebias hermaphroditus	731		blue
KO63	M1	Mangrove	Kryptolebias hermaphroditus	731	blue
KO63	M1	Mangrove	Kryptolebias hermaphroditus	1748	blue
KO64	M1	Mangrove	Kryptolebias ocellatus	988	green
KO64	M1	Mangrove	Kryptolebias ocellatus	765	red
KO64	M1	Mangrove	Kryptolebias ocellatus	1223	red
KO64	M1	Mangrove	Kryptolebias ocellatus	1558		blue
KO66	M1	Mangrove	Kryptolebias ocellatus	1273		blue
KO67	M1	Mangrove	Kryptolebias ocellatus	828	blue
KO67	M1	Mangrove	Kryptolebias ocellatus	1024		blue
KO67	M1	Mangrove	Kryptolebias ocellatus	535		black
KO70	M1	Mangrove	Kryptolebias ocellatus	998		blue
KO74	M1	Mangrove	Kryptolebias ocellatus	600	blue
KO74	M1	Mangrove	Kryptolebias ocellatus	732	green
KO75	M1	Mangrove	Kryptolebias ocellatus	1715	blue
KO76	M1	Mangrove	Kryptolebias ocellatus	219		black
KO77	M1	Mangrove	Kryptolebias ocellatus	577		blue
KO77	M1	Mangrove	Kryptolebias ocellatus	1439	blue
KO78	M1	Mangrove	Kryptolebias hermaphroditus	1394		blue
KO78	M1	Mangrove	Kryptolebias hermaphroditus	948		blue
KO78	M1	Mangrove	Kryptolebias hermaphroditus	479		green
KO78	M1	Mangrove	Kryptolebias hermaphroditus	167				blue
KO79	M1	Mangrove	Kryptolebias ocellatus	529	blue
KO80	M1	Mangrove	Kryptolebias ocellatus	1588	blue
KO80	M1	Mangrove	Kryptolebias ocellatus	819		blue
KO82	M1	Mangrove	Kryptolebias ocellatus	852		blue
KO84	M1	Mangrove	Kryptolebias ocellatus	771	blue
KO84	M1	Mangrove	Kryptolebias ocellatus	763	black
KO85	M1	Mangrove	Kryptolebias ocellatus	1831		blue
KO85	M1	Mangrove	Kryptolebias ocellatus	481		blue
KO85	M1	Mangrove	Kryptolebias ocellatus	608		pink
KO86	M1	Mangrove	Kryptolebias ocellatus	792		black
KO87	M1	Mangrove	Kryptolebias hermaphroditus	661	green
KO87	M1	Mangrove	Kryptolebias hermaphroditus	291	green
KO90	M1	Mangrove	Kryptolebias ocellatus	1358	blue
KO90	M1	Mangrove	Kryptolebias ocellatus	2571		black
KO91	M1	Mangrove	Kryptolebias hermaphroditus	268	red
KO92	M1	Mangrove	Kryptolebias ocellatus	2930		pink
KO92	M1	Mangrove	Kryptolebias ocellatus	1839		pink
KO92	M1	Mangrove	Kryptolebias ocellatus	1791		pink
KO92	M1	Mangrove	Kryptolebias ocellatus	1587		purple
KO93	M1	Mangrove	Kryptolebias ocellatus	975	black
KO93	M1	Mangrove	Kryptolebias ocellatus	1504		purple
KO94	M1	Mangrove	Kryptolebias hermaphroditus	891		blue
KO95	M1	Mangrove	Kryptolebias ocellatus	680		blue
KO95	M1	Mangrove	Kryptolebias ocellatus	534		blue
KO95	M1	Mangrove	Kryptolebias ocellatus	204		black
KO95	M1	Mangrove	Kryptolebias ocellatus	594		blue
KO97	M1	Mangrove	Kryptolebias hermaphroditus	1152	blue
KO99	M1	Mangrove	Kryptolebias ocellatus	1280		blue
KO99	M1	Mangrove	Kryptolebias hermaphroditus	635		black
KO100	M1	Mangrove	Kryptolebias hermaphroditus	1149		blue
KO100	M1	Mangrove	Kryptolebias hermaphroditus	520		blue
